# Supplementary material for: Quantum Yields of CHDO above 300 nm
Source: Copernicus journal article supplement (doi:10.5194/egusphere-2023-2254), 2023-10-13
Supplement: Supplementary file [file egusphere-2023-2254-AC1-supplement.pdf]

We thank the referees for their thoughtful comments, which helped improve the paper. Below, we summarize the modifications made to the document based on the specific comments of the referees. Both referees had suggestions regarding the presentation of the material (self-sufficient captions, consistency of notation,..). In response, we have made many edits to the manuscript to ensure the various sections, captions and tables cross-reference well and use consistent notation. These typographical edits are not indicated in detail below.

\*\* Answer to the comments of Referee #1

This paper brings life to old data from which consistent formulations of the molecular and radical channel quantum yields in CHDO photolysis are extracted. The results probably merit publication after considering a number of comments.

In general, the Figure captions appear to be of the “insider type” and not such that the Figures can be viewed and understood by the reader without a meticulous inspection of the text. The criticism applies to most of the figures; taking Figure 1 as example: "Comparison of the measured data by Miller and Lee (1978) (full dots) with the pressure dependent part of the fitted function  $f_k(M)$  for different wavelengths in nm as indicated." Without consulting the text, the reader is left wondering: Which data? Which function? What is  $Q(M)$ ?

*We have updated all figure captions, making them self-sufficient in as much as possible, and re-using the notation of the main text to facilitate cross-referencing with the discussion.*

Table 1 is not "self-consistent" in the sense that all symbols are defined either in the Table caption or in footnotes (De1 and De2).

*Table 1: ‘ $-\Delta\epsilon_1$ ,  $-\Delta\epsilon_2$  indicate the energy losses in the respective reactions’ is added to the table caption. We also note that the scheme is a two-step representation of a multi-step quenching process.*

The first Figure referenced in the text is Figure 4a in Section 3 (line 106). It is as if the authors have done a last-minute paragraph swap. Caption to Figure 4a: "Wavelength dependence of the contributions of the 3 terms of equation F7 to the total quantum yield of the CHDO photolysis at 10 hPa (a) and 1030 hPa (b)." At this point in the text, the reader is about to be introduced to where the rate coefficients  $k_1$ ,  $k_2$ ,  $k_3$  and  $k_4$  origin (that is, Table X in the paper by Miller and Lee, 1978). The rate coefficients and the derived rate coefficients ( $k_1$ ,  $k_2$ ,  $k_3$  and  $k_4$ ) are then summarized in Table 2. The authors add confusion by citing Table 2 of Miller and Lee (it is actually TABLE II) and then their own Table 2 a few lines later.

*At that point it is indeed a bit early to refer to figure F4a. The reference was removed and replaced by ‘(see later)’. The text now uses “Table X” and “Table II” with explicit reference to the original data.*

Equation (F4) is a pseudo-equation that does not add to the value of the paper and it would perhaps be better write equation (F3) in the form below and maybe indicate the wavelength dependency as well: [ Equation ]

*Equation F4 is completed. It is needed explicitly as it is plotted in Figure 1.*

Table 2. The excitation wavelengths listed are rounded numbers from the Miller and Lee (ML) 1978 publication that states: the out-of-plane bending mode ( $\nu$ ) is the inducing mode for radiative transitions and also the promoting mode for the nonradiative transitions. Why not use the wavelengths given by ML? Why are the 316.2 nm ML data not used? The ML 320.2 nm data are entered in Table 2 with 329 nm excitation – why? Have the authors located misprints in the ML TABLE II? If yes, this should be communicated. The 329, 344 and 353 nm data for  $k$  and  $k$  in Table 2 do not correspond to any  $t$ -numbers in the ML TABLE II. Where do these numbers come from? The 329 nm data (ML 320.2 nm) refers to fluorescence from the  $1\ 4\ (S)$  state ( $\nu$  corresponds to the CH str), and the “next lower vibrational level” would be the  $4\ (S)$  state, for which fluorescence data are found for 353 nm excitation. However, this is the only case not involving the  $\nu$  mode (C=O str). Obviously, there are no data for the “next lower vibrational levels” of the  $4$  and  $4$  states involving  $\nu$ , yet numbers appear for  $k$  and  $k$  in Table 2. In summary, the selection of data could be better described.

*The wavelength 329 nm seems to be an outlier, and even the authors Miller and Lee did not use these data later in their paper. We removed that entry from the table, now stating explicitly that we use the  $2^j 4^j$  transitions only. The table is upgraded to show the exact wavelengths from the original publication. For 344.4 and 352.9 nm,  $k_5$  and  $k_6$  are now indicated explicitly as estimates.*

Line 154. The authors state: The pivot wavelength  $1/\epsilon$  is 348.6 nm, as published in Nilsson et al. 155 (2014). Maybe they should mention that the 348.8 nm originates from quantum chemistry calculations of the barriers to dissociation H-CHO, H-CDO, D-CHO and D-CDO.

*We now mention explicitly that these come from theoretical calculations, adding the text ‘...from quantum chemistry calculations of the barriers to dissociation H-CHO, H-CDO, D-CHO, and D-CDO’*

Line 168. “optimal values” should probably be “optimized values”

*‘optimal values’ is replaced by ‘optimized values’.*

Table 3, Line 185. The A-value for  $k$  must have been derived taking the  $k$ -value for 329 nm as an outlier. Are there other examples of data-massage? There are no error estimates included in Table 3 to indicate the validity of the smoothing procedure.

*The 329 nm value is an outlier and indeed omitted. See also our comments on changes to Table 2 above, where we now state explicitly we only use the  $2^j 4^j$  transitions, and have 2 rows containing estimates for  $k_5$  and  $k_6$ . No other data-massage was performed, other than neglecting the B-factor if the wavenumber-dependence is negligible (see text below eq. F8).*

*The caption for Table 3 now also states the values are derived from a least square fit, and the related text below eq. F8 was updated for clarity. Finally, the estimated variance is added.*

Line 242. The numbers in the equation are not the same as those given in the reference, but are apparently rounded. However, some of the numbers are rounded outside the error limits given in the reference.

*Equation F12 is exactly the same as the recommended function (8) in Table 1 (p. 7199) of Röth and Ehhalt (2015) (omitting the uncertainties), which however does differ from the fitting equation (3) given earlier in the paper on p. 7196. The difference is due to the fitting procedure for radical quantum yields separately, versus radical+molecular+total quantum yields simultaneously.*

Figure captions, Line 562. As mentioned, the Figures including captions should preferably be self-consistent. In general, this is not the case.

*All figure captions are extensively rephrased, re-using the symbols as in the main text and referring explicitly to the equations underlying the graphs. We feel the captions are now significantly more informative.*
